1 Neural correlates of perceiving and  
2 interpreting engraved prehistoric patterns  
3 as human production: effect of  
4 archaeological expertise

5  
6 Salagnon M<sup>1,2,3</sup>, Cremona S<sup>1,2,3</sup>, Joliot M<sup>1,2,3</sup>, d'Errico F<sup>4,5</sup> Mellet E<sup>1,2,3\*</sup>,

7  
8 <sup>1</sup> Univ. Bordeaux, GIN, IMN UMR 5293, Bordeaux, France

9 <sup>2</sup> CNRS, GIN, IMN UMR 5293, Bordeaux, France

10 <sup>3</sup> CEA, GIN, IMN UMR 5293, Bordeaux, France

11 <sup>4</sup> Univ. Bordeaux, PACEA UMR 5199, CNRS, Pessac, France

12 <sup>5</sup> SFF Centre for Early Sapiens Behaviour (SapienCE), University of Bergen, Bergen,  
13 Norway.

14  
15 \* Corresponding author  
16 E-mail: [emmanuel.mellet@u-bordeaux.fr](mailto:emmanuel.mellet@u-bordeaux.fr)

17  
18

19 **KEYWORDS:** Human evolution, Symbols, Engravings, Neuroarchaelogy, Perception,  
20 Expertise, fMRI

21  
22

## 23 **Abstract**

24

25 It has been suggested that engraved abstract patterns dating from the Middle and Lower  
26 Palaeolithic served as means of representation and communication. Identifying the brain  
27 regions involved in visual processing of these engravings can provide insights into their  
28 function. In this study, brain activity was measured during perception of the earliest known  
29 Palaeolithic engraved patterns and compared to natural patterns mimicking human-made  
30 engravings. Participants were asked to categorise marks as being intentionally made by humans  
31 or due to natural processes (e.g. erosion, root etching). To simulate the putative familiarity of  
32 our ancestors with the marks, the responses of expert archaeologists and control participants  
33 were compared, allowing characterisation of the effect of previous knowledge on both  
34 behaviour and brain activity in perception of the marks. Besides a set of regions common to  
35 both groups and involved in visual analysis and decision-making, the experts exhibited greater  
36 activity in the inferior part of the lateral occipital cortex, ventral occipitotemporal cortex, and  
37 medial thalamic regions. These results are consistent with those reported in visual expertise  
38 studies, and confirm the importance of the integrative visual areas in the perception of the  
39 earliest abstract engravings. The attribution of a natural rather than human origin to the marks  
40 elicited greater activity in the salience network in both groups, reflecting the uncertainty and  
41 ambiguity in the perception of, and decision-making for, natural patterns. The activation of the  
42 salience network might also be related to the process at work in the attribution of an intention  
43 to the marks. The primary visual area was not specifically involved in the visual processing of  
44 engravings, which argued against its central role in the emergence of engraving production.

45

## 46 **Introduction**

47  
48 The cognitive abilities of our prehistoric ancestors and how they evolved have become a crucial  
49 area of research in archaeology and anthropology (1–4). Different research strategies are  
50 followed to investigate this topic. Past cognition can be inferred by analysing the material  
51 culture prehistoric populations have left behind, under the assumption that behavioural patterns  
52 reflect cognitive processes. A wide range of past behaviours have been investigated in this  
53 perspective, such as subsistence strategies (5,6), stone and bone tool-making (7–15), containers  
54 (16), pigments (17–21), tool hafting (22,23), mortuary practices (24,25), ornamental objects  
55 (26–28), engraving and painting of cave walls and objects (29,30). More recently, past  
56 cognition has become the subject of interdisciplinary research combining archaeological data  
57 with methods and concepts from neuroscience (31–33).

58 Neuroarchaeology, as it has been termed, aims to create conceptual frameworks for modelling  
59 the evolution of human cognition in light of advances in the neurosciences, and to test such  
60 models experimentally based on data collected from modern participants. Research in this  
61 domain has investigated the potential co-evolution of tool-making and language by studying  
62 the overlap of the brain networks mobilised by these two skills (34–38). The implication of  
63 executive functions and working memory in the production of knapped stone tools, involving  
64 different levels of cognitive control and neural substrates depending on the complexity of the  
65 practised stone tool technology, has also been the subject of studies (34,35,39,40).

66 The emergence of symbolic behaviour has also been investigated recently by neuroarchaeology.  
67 Some archaeologists have argued that the earliest graphic manifestations, dating from the  
68 Lower and Middle Palaeolithic in Eurasia and the African Middle Stone Age, were conceived  
69 and used as signs or symbols, and thus demonstrate abstraction and communication capacities  
70 that were not previously attributed to the human populations of those times (41–49). Others  
71 contend that early abstract engraving production resulted from low-level visual perceptual

72 phenomena (50–52) and should be interpreted as a “proto-aesthetic” behaviour devoid of  
73 semiotic intent. Still others see the production of abstract engravings as resulting from  
74 kinaesthetic dynamics of a non-representational sort that allowed hominins to engage and  
75 discover the semiotic affordances of mark-making (53), or as decorative, cultural transmitted  
76 patterns with no apparent symbolic meaning (54). In a previous study (55), we characterised  
77 the neural basis of the visual processing of prehistoric abstract engravings dated between  
78 540,000 and 30,000 years before the present, and showed that despite their relatively simple  
79 structure, engraving perception engaged the visual cortices of the ventral visual pathway that  
80 are involved in the recognition and identification of objects.

81 Consistent with the view of their being representational in nature, our first results showed that  
82 the primary visual area was not sensitive to the global organisation of the engravings, and thus  
83 did not support the previously suggested hypothesis that this region played a specific and  
84 exclusive role in the emergence and perception of the production of early engravings (50,56).  
85 The debate stimulated by these findings (57,58) and, in particular, the criticism that inferences  
86 drawn from experiences with present-day humans could be inadequate for understanding  
87 perceptual processes specific to our prehistoric ancestors, makes it necessary to develop  
88 strategies to overcome this potential drawback to the extent possible.

89 Attributing intentional human agency to abstract marks is a prerequisite for using them as a  
90 medium for culturally-mediated indexical communication. Our ancestors needed to distinguish  
91 purposely made engravings from other accidental or natural marks in order to recognise their  
92 communicative potential and use them as means to store, transmit and retrieve meaning. It is  
93 reasonable to assume that if abstract engravings were used as signs or symbols by our ancestors,  
94 the latter must have shared a knowledge that allowed them to recognise the engravings as the  
95 result of a conscious, deliberate, technical action intended to embody meaning in a tangible  
96 medium. To simulate this knowledge, we included archaeologist participants who are familiar

97 with or experts in prehistoric engravings. We compared them at both behavioural and brain  
98 functional levels to a control group with no such expertise, paired for age, gender, and level of  
99 education. The first aim of the present work was to estimate the effect of familiarity and prior  
100 knowledge, hereafter referred to as *Expertise*, on the brain regions involved in the perception  
101 of abstract engravings and their attribution to human agency. The present study investigated  
102 this effect in a “Judgment” task where participants had to assess whether past humans had  
103 produced the marks on objects intentionally, or whether the marks resulted from natural  
104 processes such as erosion, carnivore gnawing or root etching. Therefore, this study explored  
105 whether familiarity modifies the regions involved in the visual processing of engravings,  
106 particularly in the primary visual area. The second aim of the study was to assess whether the  
107 attribution of the marks to human *versus* non-human agency could be differentiated at the  
108 functional brain level, and to what extent such difference could be conditioned by the observer's  
109 expertise.

## 110 **Materials and Methods**

111

### 112 **Participants**

113 Thirty-one healthy adults with no neurological history were included after providing written  
114 informed consent to participate in the study. They were divided into two groups according to  
115 their expertise in Palaeolithic archaeology: Controls, without any prior background in the  
116 discipline (n = 15, mean age  $\pm$  SD: 44  $\pm$  10 years, range: 30-63 years, six women, none left-  
117 handed) and Experts, i.e. scholars actively working in the discipline with knowledge in  
118 Palaeolithic art and bone modifications (n = 16, mean age  $\pm$  SD: 44.6  $\pm$  10 years, range: 32-61  
119 years, six women, one left-handed). The two groups of participants were matched for age,  
120 gender, and education level (PhD, 20 years of schooling after first grade).

### 121 **Ethics statements**

122 The 'Sud-Ouest outremer III' local Ethics Committee approved the study (N°=2016-A01007-  
123 44).

## 124 **MRI Acquisition**

125 The blood oxygen level-dependent (BOLD) signal was mapped in the 31 volunteers using  
126 functional magnetic resonance imaging (fMRI) with a Siemens Prisma 3 Tesla MRI scanner.  
127 The structural images were acquired with a high-resolution 3D T1-weighted sequence (TR =  
128 2000 ms, TE = 2.03 ms; flip angle = 8°; 192 slices and 1 mm isotropic voxel size). The  
129 functional images were acquired with a whole-brain T2\*-weighted echo-planar image  
130 acquisition (T2\*-EPI Multiband x6, sequence parameters: TR = 850 ms; TE = 35 ms; flip angle  
131 = 56°; 66 axial slices and 2.4 x 2.4 x 2.4 mm isotropic voxel size). The functional images were  
132 acquired in three runs during a single session. The experimental design was programmed using  
133 E-prime software (Psychology Software Tools, Pittsburgh, PA, USA). The stimuli were  
134 displayed on a 27" screen. The participants viewed the stimuli through the magnet bore's rear  
135 via a mirror mounted on the head coil.

## 136 **Description of the task**

137 Participants performed a judgment task based on the visual presentation of pictures of  
138 intentionally human-made and natural marks. The judgment task included two conditions:  
139 Attribution ("is the mark intentionally made by a human being?") or Orientation ("is the longest  
140 axis of the medium on which the marks are present vertical?"). The Orientation task was a  
141 control condition during which participants perceived the same stimuli as in the Attribution  
142 condition. The contrast [Attribution minus Orientation] allowed activations that were not  
143 specific to human/non-human judgment to be cancelled out. For each stimulus, the type of  
144 judgment to be made (i.e. Attribution or Orientation) was displayed during 0.5s, before the  
145 stimulus was presented. Then the stimulus was presented for 3s (Fig 1). Participants had to  
146 answer "yes" or "no" by clicking on a response box as soon as the stimulus was replaced by the

147 one-second reminder of the instruction ("human?" or "vertical?"). During the baseline, a  
148 fixation cross was displayed and a square appeared after a variable delay (3.5s  $\pm$  1s).  
149 Participants had to click on the response box as soon as the square appeared (Fig 1). The  
150 participants saw a total of 21 different human-made marks and 21 different natural marks  
151 divided into three runs lasting 5 min and 57 sec each, presented in a randomized order.  
152 Participants thus saw the item twice, once in the Attribution judgement and once in the  
153 Orientation judgement.

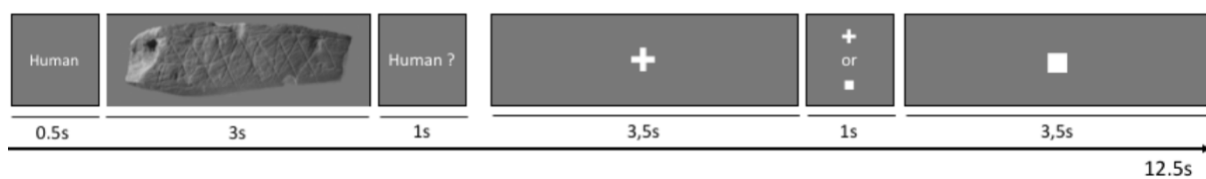

154

155 **Fig1. Organization of a trial in the judgment task.** Participants were presented each item twice (once during  
156 the Attribution and once during the Orientation task). The participants were shown 21 different human-made and  
157 21 natural marks.

## 158 **Stimuli**

159 The pictures consisted of photographs of 21 archaeological objects that previous studies had  
160 shown to carry engravings of human origin (29,59,60). The engravings are dated between 540  
161 ka and 30 ka, come from African and Eurasian sites, and are attributed to *Homo erectus*,  
162 Neanderthals and Early Modern Humans. The original pictures were converted into greyscale  
163 and put on a grey background (Fig 2, left). The natural marks category included 21 objects in  
164 different materials bearing modifications produced by natural modelling of the bone surface  
165 (e.g. imprints of nerves and vascular canals), gnawing by carnivores, root etching, erosion, and  
166 fossilisation of plants (61). Pictures were converted into greyscale and displayed on a grey  
167 background (Fig 2, right).

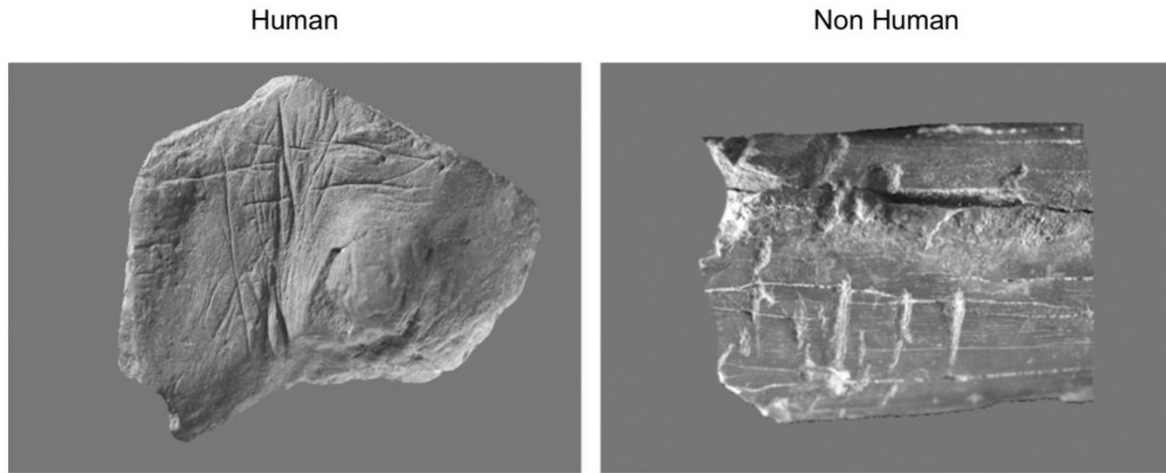

168

169 **Fig 2. Examples of stimuli used in the judgment task.** Left: human stimulus (engraving from Blombos Cave,  
170 Southern Africa, c. 77,000 years old). Right: non-human marks due to carnivore gnawing.

### 171 **Post fMRI session debriefing**

172 After the fMRI session, the participants were asked to indicate the criteria on which they had  
173 based their decision. The criteria were: shape of the marks, criss-cross patterns, presence of  
174 parallel marks, repetition of identical marks, depth of the marks, number of marks and the  
175 nature of medium of the marks.

176 In addition, the experts were asked whether they had ever seen any of the engravings.

### 177 **Data analysis**

#### 178 **Preprocessing**

179 Functional volumes were processed using Nipype, which allows the different steps to be  
180 chained together (62). The T1-weighted scans of the participants were normalised to a site-  
181 specific template, matching the MNI space using the SPM12 'segment' procedure with the  
182 default parameters. To correct for subject motion during the fMRI runs, the 192 EPI-BOLD  
183 scans were realigned within each run using a rigid-body registration. Then, the EPI-BOLD  
184 scans were rigidly registered structurally to the T1-weighted scan. The combination of all the  
185 registration matrices allowed warping of the EPI-BOLD functional scans to the standard space



186 with trilinear interpolation. Once in the standard space, a 5 mm FWHM Gaussian filter was  
187 applied.

## 188 **First level analysis**

189 For each subject, global linear modelling (GLM, statistical parametric mapping (SPM 12),  
190 <http://www.fil.ion.ucl.ac.uk/spm/>) was used for processing the task-related fMRI data, with  
191 effects of interest (tasks) being modelled by boxcar functions corresponding to paradigm  
192 timing, convolved with the standard SPM hemodynamic temporal response function. We then  
193 computed the effect of interest-related individual contrast maps, corresponding to each  
194 experimental condition. Note that 8 regressors of no-interest were included in the GLM  
195 analysis: time series for WM, CSF (average time series of voxels belonging to each tissue class),  
196 the six motion parameters and the temporal linear trend.

## 197 **Analysis of behavioural response**

198 To assess whether the observed correct response rates were different from chance, we  
199 calculated the 95% confidence interval of a random response rate for 42 trials. Rates outside  
200 the 34-66% range were considered significantly different from chance.

201 To estimate the effect of Expertise on correct response rates, we analysed the behavioural  
202 responses for Attribution and Orientation separately, since the distribution of the correct  
203 response rate for the Orientation condition was not Gaussian. We used a non-parametric  
204 Wilcoxon test to evaluate performance differences between Experts and Controls in the  
205 Orientation condition.

206 To test whether the effect of Expertise depended on the type of judgment made in the  
207 Attribution condition, we estimated the interaction effect between Expertise and Attribution on  
208 the correct response rate, using a linear mixed-effect model fitting random effects at the  
209 participant level. A two-way interaction term between Expertise and Attribution (and their  
210 lower-order terms) was set as the fixed effect predictors, and correct response rate as the

211 dependent variable. The significance of fixed effects was assessed through ANOVA  
212 components.

### 213 **Analysis of debriefing data**

214 To assess the effect of Expertise on the criteria used to discriminate intentional human marks  
215 versus non-human ones, we computed a chi-squared test for each of the seven criteria.

### 216 **Analysis of fMRI data**

217 Group analysis of fMRI data was carried out using JMP®, Version 15. SAS Institute Inc., Cary,  
218 NC, 1989-2019. A first step was to select the regions that were activated significantly in the  
219 contrast of interest, namely [Attribution *minus* Orientation]. We extracted signal values from  
220 the first-level analysis maps of each of the 192 homotopic regions of interest (hROI) of the  
221 AICHA functional atlas (63) for each experimental condition. Two hROIs were excluded from  
222 the analysis because of a lack of signal in at least 15% of their volume: gyrus parahippocampal-  
223 4 (19% non-signal) and Thalamus-8 (46.66% non-signal). The hROIs included in the analysis  
224 fulfilled two criteria in each group of participants: 1. Significantly more activated in the  
225 [Attribution *minus* baseline (cross fixation)] contrast (univariate t-test  $p < 0.05$  uncorrected) to  
226 discard deactivated hROIs. 2. Significantly more activated in the [Attribution *minus*  
227 Orientation] contrast (univariate t-test  $p < 0.05$  FDR corrected) to discard activation not specific  
228 to Attribution. hROIs selected for Experts and Controls were grouped to obtain the final list of  
229 hROIs included in the subsequent analysis.

230 To assess the effect of Expertise on BOLD activations according to the Attribution response  
231 (human or non-human marks), a mixed-effect linear regression model was implemented on the  
232 BOLD values of the 64 hROIs activated in the [Attribution *minus* Orientation] contrast. A three-  
233 way interaction term between hROIs (64) X Expertise (Experts, Controls) X Attribution  
234 (Human, Non-human) and all lower order terms was set as the fixed effect predictors, BOLD

235 values as the dependent variable and random effects were fitted at the participant level. The  
236 significance of fixed effects was assessed through ANOVA components.

237

## 238 **Results**

### 239 **Behavioural results**

240 In the Attribution condition, Experts gave 81.3% (mean)  $\pm$  15% (SD) of correct responses (for  
241 both human and non-human attribution) while Controls responded correctly to 61.3% (mean)  
242  $\pm$  17% (SD) of the items. The number of correct responses in Orientation did not differ between  
243 Experts and Controls (88.1%  $\pm$  14% and 86.7%  $\pm$  17% respectively,  $p = 0.96$ , Wilcoxon), thus  
244 showing, as expected, that the expertise effect was present in Attribution but not in Orientation  
245 condition.

246 We did not observe any significant interaction between Expertise and Attribution ( $F_{(1,29)}=0.56$ ,  
247  $p=.46$ , Fig 3). However, the linear mixed-effect model revealed a main effect of Expertise, with  
248 Experts exhibiting better performances than Controls ( $F_{(1,29)}=31.3$ ,  $p < 0.0001$ ), and a main  
249 effect of Attribution, as the rate of correct responses was higher for human than non-human  
250 judgments ( $F_{(1,29)}=14.3$ ,  $p < 0.0007$ ). Thus, whatever the type of judgment made, experts had a  
251 better rate of correct response than controls on average and, whatever the level of expertise, the  
252 correct response rate was higher on average for human than non-human judgment.

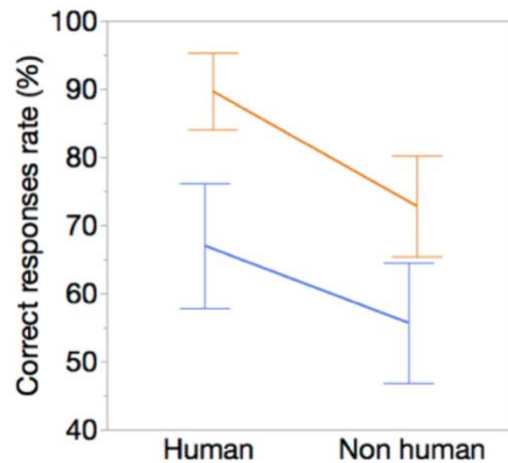

253

254 **Fig 3. Effects of Expertise and Attribution (human vs non-human marks) on the correct**  
255 **response rate.** Orange: Expert, blue: Controls. Error bars represents the confidence interval  
256 (95%).

257

## 258 **Debriefing results**

259 The decision criteria reported by the participants for attributing a human agency to abstract  
260 marks were repetition of identical marks, shape of the marks, presence of parallel marks, and  
261 presence of criss-cross patterns. Some participants also reported paying attention to the support  
262 of the marks, the depth of the marks, and the number of marks. Despite a higher rate of correct  
263 responses for Experts than Controls, Expertise had no effect on the decision criteria reported  
264 by subjects in the debriefing ( $p > .05$  for all chi-squared tests).

## 265 **Neuroimaging results**

### 266 **Selection of hROIs**

267 The comparison of the Attribution and Orientation conditions evidenced 64 hROIs that were  
268 significantly more activated in Attribution than in Orientation (Fig 4, and see S1 Table and S2  
269 Table in supporting information). They included the occipito-temporal regions, lateral occipital  
270 cortex, anterior insula, parahippocampal cortex, hippocampus, medial frontal cortex, anterior

271 cingulate and at the subcortical level, thalamus and caudate nuclei . The effect of expertise and  
272 the type of judgement (*i.e.* human or non-human) were explored within this set of hROIs.

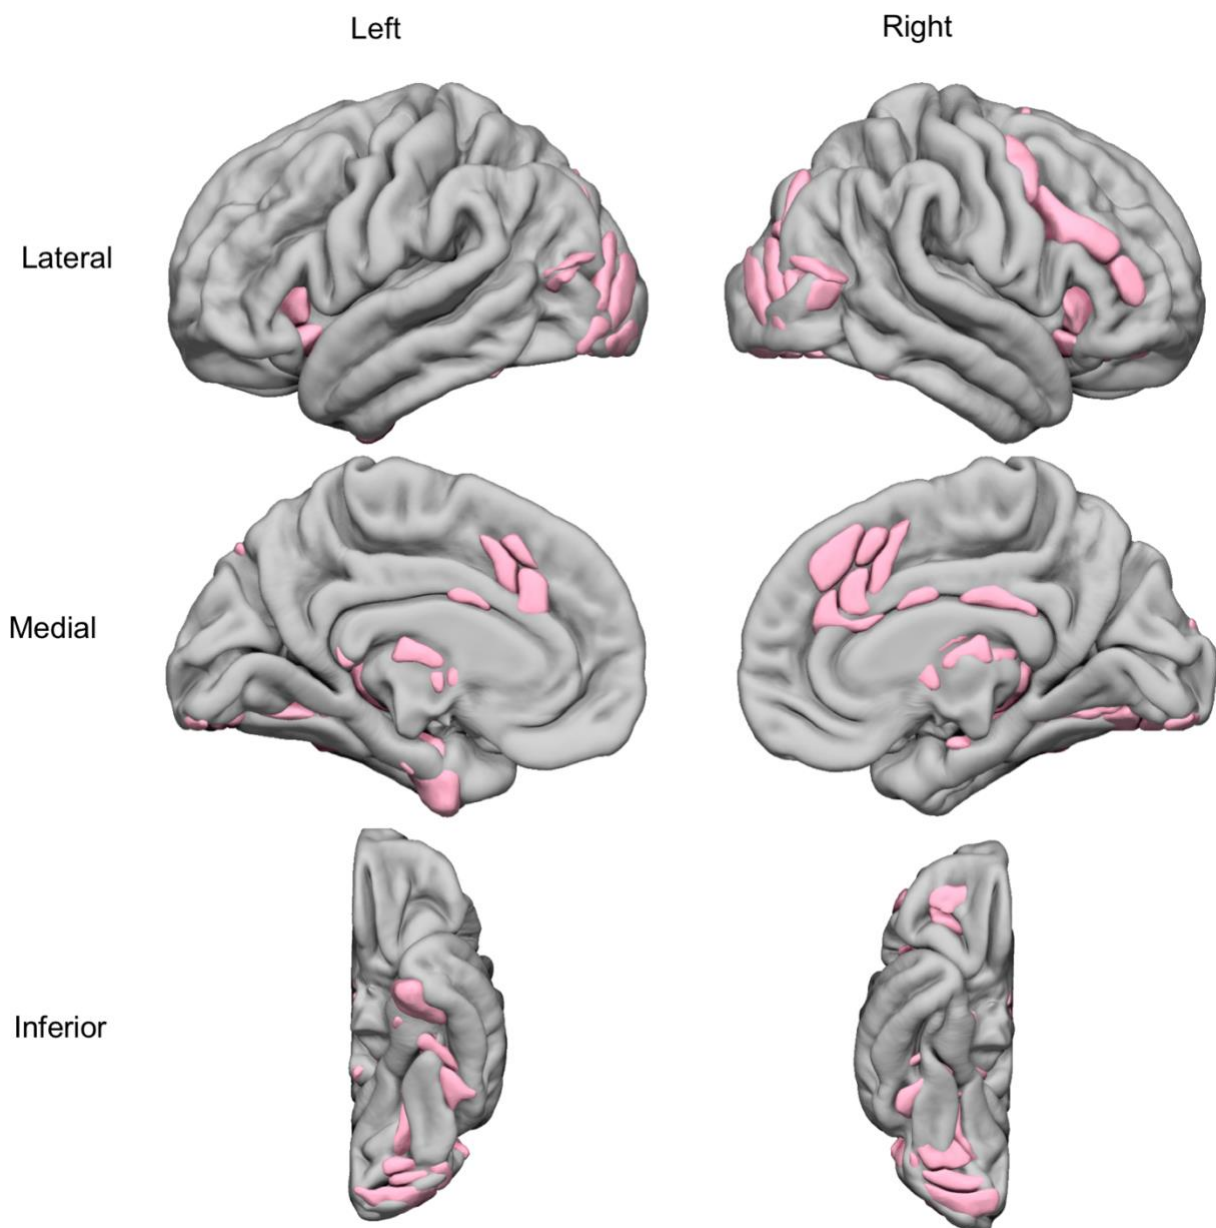

273

274 **Fig 4. Superimposition on an MRI template of the 64 hROIs activated during the [Attribution minus**  
275 **Baseline] condition and showing a significant BOLD signal increase in the Attribution minus Orientation**  
276 **contrast ( $p < 0.05$ , FDR corrected).**

277

278 **Effect of Expertise and Attribution on BOLD activations in the 64 selected**  
279 **hROIs**

280 To assess whether Expertise interacts with Attribution and hROIs to modify BOLD levels, we

281 set their 3-way interaction as fixed effects in a mixed-effect linear regression model. We

282 observed no interaction between Expertise, Attribution, and hROIs ( $F_{(63,1827)} = 0.63$ ,  $p = 0.99$ )  
283 nor between Expertise and Attribution ( $F_{(1,29)} = 0.01$ ,  $p = 0.90$ ). This suggests that differences in  
284 brain region between attribution of human and non-human origin of the marks were the same  
285 in Experts and Controls.

## 286 **Effect of Expertise**

287 We found that regional BOLD response differed between Experts and Controls (Expertise X  
288 hROI interaction:  $F_{(63,1827)} = 2.14$ ,  $p < .0001$ ). *Posthoc* analysis revealed that visual areas were  
289 more activated by Experts than by Controls (Fig 5). It included regions belonging to the lateral  
290 occipital cortex, the occipital pole (all  $p < .05$ , FDR corrected) and a part of the left fusiform  
291 gyrus that nearly reached significance after correction for multiple testing ( $p = .02$ ,  
292 uncorrected). In addition, Experts activated the anterior medial thalamus more strongly  
293 ( $p < .05$ , corrected), while a more posterior part of the medial thalamus did not survive  
294 correction ( $p = .04$ , uncorrected). No region was more activated in Controls than in Experts.

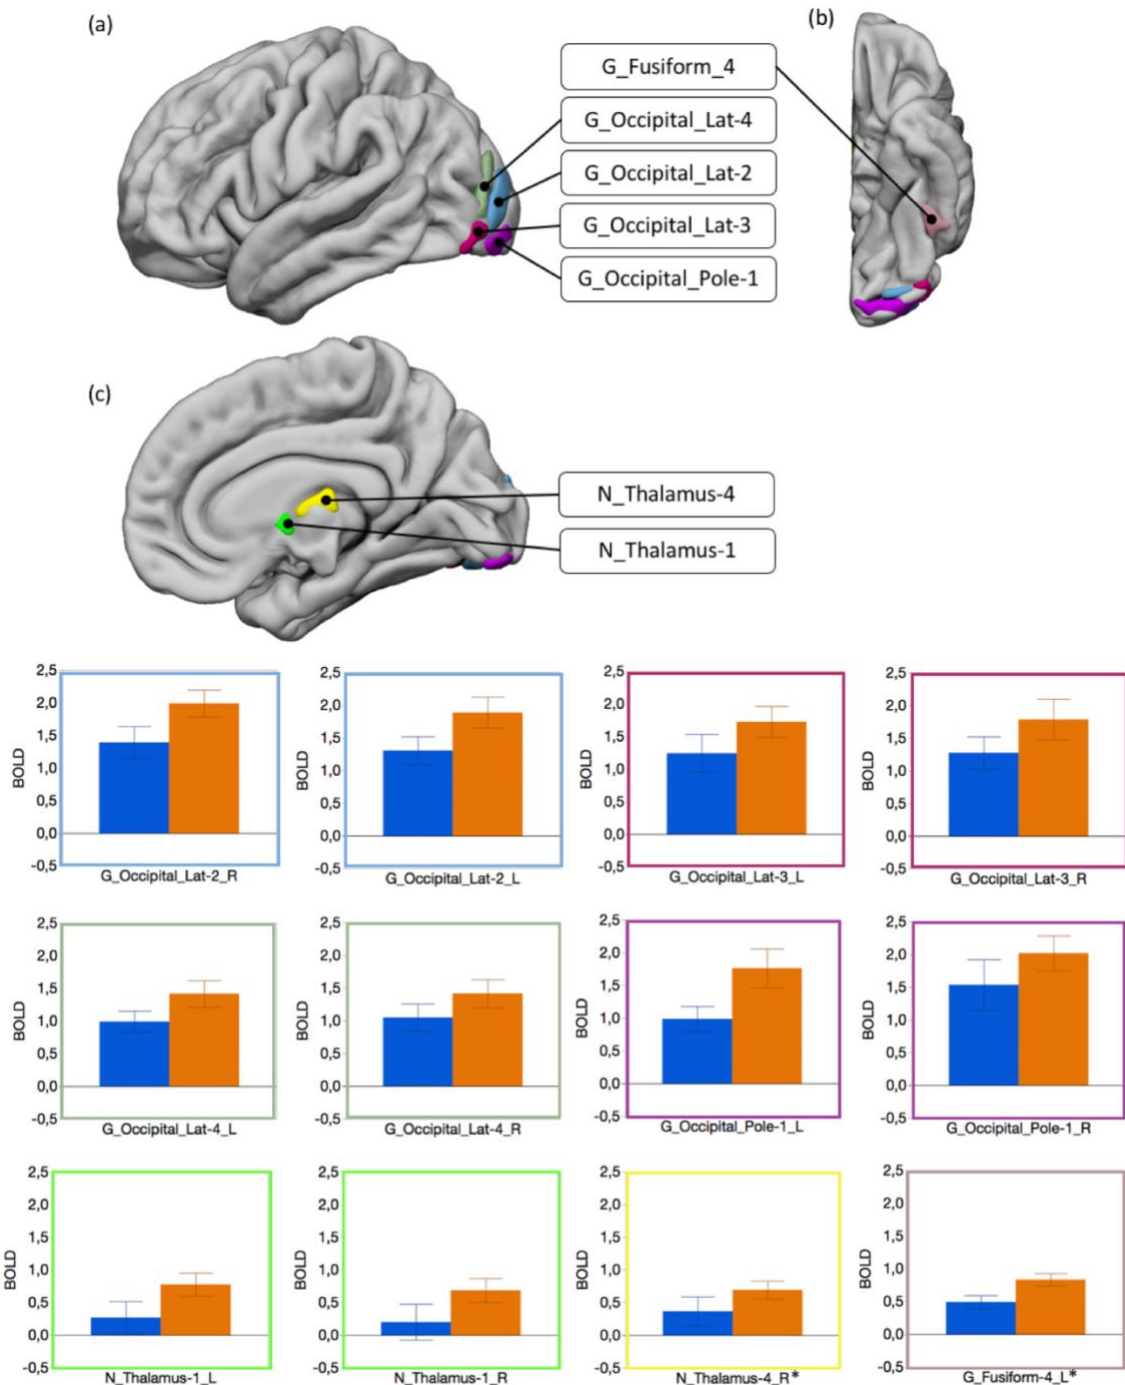

295

296 **Fig 5. Experts compared to Controls in the Judgment task.** Top: hROIs that showed a greater activity in Experts  
 297 than in Controls. \*: G\_Fusiform-4\_L and N\_Thalamus-4\_R were significant at uncorrected threshold only ( $p_{uncorr}=$   
 298 0.015 and  $p_{uncorr}= 0.019$ , respectively). (a) Lateral view of the left hemisphere. (b) Inferior view of the left  
 299 hemisphere. (c) Medial view of the left hemisphere. Bottom: plots of the BOLD values in these regions in Controls  
 300 (blue) and Experts (orange). Error bars represents the confidence interval (95%).  
 301

## 302 Effect of Attribution

303 We found that regional BOLD response differed according to the type of judgment expressed  
 304 during the Attribution condition (Attribution X hROI interaction:  $F_{(63,1827)} = 2.87$ ,  $p < .0001$ ).



305 Post-hoc analysis revealed that regions belonging to the anterior insula, the anterior cingulate,  
 306 the medial thalamus, and the right caudate nucleus were significantly more activated when a  
 307 non-human origin was attributed to the marks (Fig 6, all  $p < .05$ , FDR corrected). No regions  
 308 were more activated for the “Human” attribution.

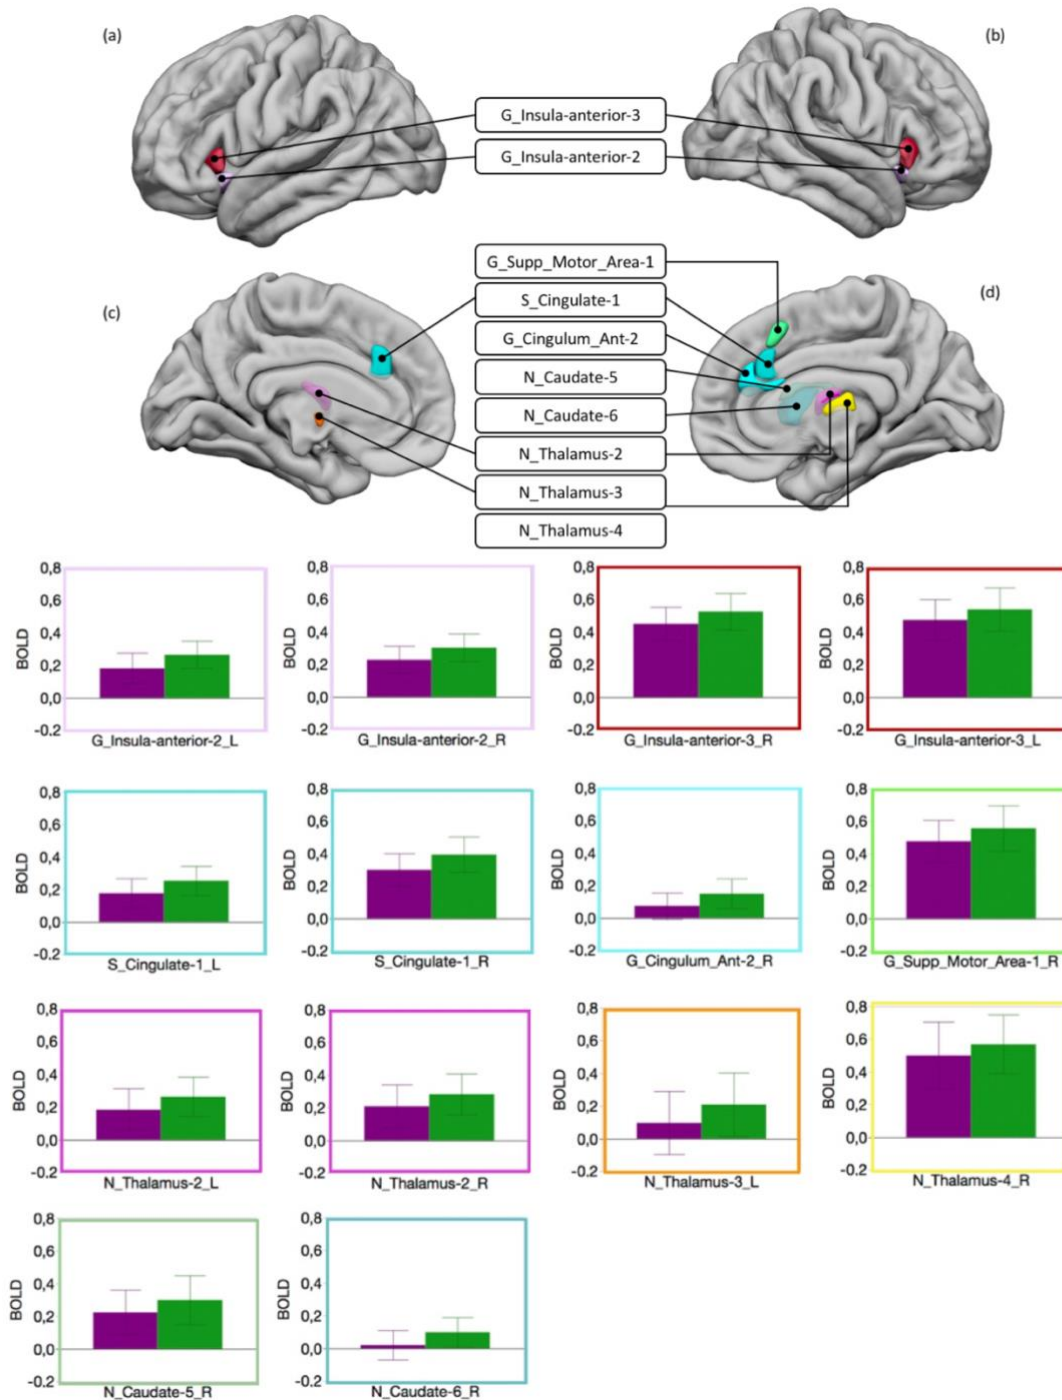

309

310 **Fig 6. Human vs Non-human attribution** Top: hROIs that showed a greater activity for non-human than for  
 311 human attribution. (a) Lateral view of the left hemisphere. (b) Lateral view of the right hemisphere. (c)  
 312 Medial view of the left hemisphere. (d) Medial view of the right hemisphere. Bottom: plots of the BOLD values in these



313 regions for human attribution (purple) and non-human attribution (green). Error bars represents the confidence  
314 interval (95%).

315

## 316 **Discussion**

317 This study aimed to characterise the effect of expertise in the perception of the earliest  
318 Palaeolithic abstract engravings at the behavioural and brain levels, using a judgment task  
319 between human-made engravings and surface modifications resulting from natural phenomena.

### 320 **Effect of expertise**

321 During the Attribution condition of the judgement task, the participants had to decide whether  
322 the marks were intentionally human-made or the result of natural processes. This task was  
323 contrasted with an Orientation condition in which the same stimuli were used without  
324 participants paying attention to the marks on the supports. Although the distinction criteria did  
325 not differ between experts and controls, the performances were significantly better for the  
326 experts. Note that archaeologists usually rely on much more refined analysis, not limited to a  
327 short visual analysis, to discern the human or natural origin of the marks. Nonetheless, the  
328 archaeologists confirmed their expertise in judging the natural or human origin of the  
329 engravings better than Controls, while they did not differ from them in the Orientation  
330 condition. As experts, the performances of archaeologists benefited from a greater ability to  
331 focus on the most discriminating elements, thus reducing the complexity of perceptual analysis.  
332 In addition, they could connect the perceptual analysis to knowledge stored in long-term  
333 memory and gained over many years and even decades. One could argue that these better  
334 performances reflected recognition of engravings previously encountered in the literature or  
335 their own research rather than an actual process of visual analysis. However, although a  
336 majority of experts recognised some of the engravings, only three recognised about ten, while  
337 the others recognised less than five. In addition, the experts were also better at identifying traces  
338 of natural origin, which supports the role of expertise in determining their higher performances.

339 During Attribution, Experts showed greater activation in the ventral part of the lateral occipital  
340 cortex and a strong trend in the left fusiform gyrus (G\_Fusiform-4 in the AICHA atlas) in the  
341 occipito-temporal cortex (OTC). This result could reflect more discriminating visual analysis,  
342 which allowed a correct diagnosis of the origin of the marks. It has already been shown that the  
343 visual cortex and particularly OTC are involved in the visual processing of objects pertaining  
344 to the domain of expertise of the observer (64,65). For example, in a field that involves long-  
345 term acquired knowledge, as in the present study, it has been shown that experienced  
346 radiologists exhibit greater activation in OTC than less experienced ones when they detect  
347 lesions on chest radiographs (66,67). Most of the studies demonstrating the role of OTC in  
348 expertise have reported activation of a part of the fusiform gyrus called FFA (68–72). It has  
349 been suggested that this region, which is crucial in face recognition, is more generally  
350 specialised in discriminating between stimuli that share common (prototypical) visual features  
351 and differences that are essentially accessible to the expert. This region is included in  
352 G\_Fusiform-6 in the AICHA atlas and was not activated differently in Experts and Controls.  
353 Most of the studies that reported more activated FFA in experts relied on tasks favouring  
354 holistic processing (as in face recognition, (64)). In our study, participants based their decision  
355 on visual details (number of crossings, depth of marks) and were therefore processing the marks  
356 analytically rather than holistically. This could explain the lack of an expertise effect in this  
357 region, while it was present in adjacent areas.

358 The involvement of the "low level" visual areas was limited to a small region of the occipital  
359 pole (Fig 5, light purple blob), which was detected in both groups and more important in Experts  
360 than in Controls. Activity in the calcarine sulcus, which includes the primary visual area, did  
361 not increase during the attribution task compared to the Orientation task. This lack of activation  
362 argues against the hypothesis that low-level perceptual processes in this area are at the origin  
363 of the emergence of engravings production, as previously suggested (52,56), even in subjects

364 familiar with Palaeolithic marks. As a matter of fact, the vast majority of activations were in  
365 the associative visual cortex, including the OTC. The involvement of the visual cortex in this  
366 study illustrates its role in visual expertise. It does not fundamentally alter the conclusions of a  
367 previous study that highlighted the role of these regions in the visual analysis of engravings  
368 (55). In particular, it confirms that the visual analysis of the earliest abstract engravings engaged  
369 integrative visual areas involved in identifying visual percepts.

370 In the present work, Experts showed a greater involvement of the medial thalamus than  
371 Controls. The mediodorsal part of the thalamus is known to be involved in familiarity,  
372 corresponding to the impression that a percept or percepts of the same category have been  
373 experienced previously (73,74). In the present study, the archaeologists did not implement a  
374 different strategy from the control participants. Both groups relied on similar criteria to decide  
375 whether the engravings were of human or natural origin. The main difference is the long  
376 experience of archaeologists with both types of marks. Activation of the mediodorsal thalamus  
377 in the experts could reflect familiarity with these types of stimuli.

### 378 **Attributing a human or non-human origin to the marks**

379 Our results showed that attributing a human or non-human origin to the marks is not equivalent,  
380 whether at the behavioural or the neural level. The lack of interaction between the Attribution,  
381 Expertise and hROIs indicated that the type of judgment (i.e. human or not human) did not  
382 affect BOLD differently in Experts and Controls. This is congruent with the absence of  
383 interaction between the attributed origin of the marks and the level of expertise at the  
384 behavioural level, indicating that both Experts and Controls made more errors for non-human  
385 than human attribution (with the Experts being better than controls in both categories). At the  
386 cerebral level, attributing a non-human origin to the marks resulted in greater activation in  
387 subcortical regions such as the head of the caudate nucleus and the thalamus and cortical areas  
388 including the anterior insula and the anterior cingulate, compared to assigning a human origin.

389 All these regions belong to the so-called salience network (75–77). This plays a fundamental  
390 role in detecting and selecting behaviourally relevant stimuli and is thus crucial in the decision-  
391 making process (78–80). It is therefore not surprising that it was activated in our attribution  
392 task. The question is why it was activated more by the "non-human" choice than by the "human"  
393 choice. A meta-analysis showed that the activity in this network increased with uncertainty  
394 (81). The rate of correct responses indicated that deciding that a mark was non-human was more  
395 uncertain than the opposite choice and might have triggered the greater activation of the  
396 salience network. This hypothesis is further supported by the fact that the anterior insula and  
397 anterior cingulate cortex would be particularly active during decision-making in a context of  
398 strong perceptual ambiguity (82,83).

399 Interestingly, it has recently been shown that the cingulate and insular cortex in the salience  
400 network were involved in attributing others' intentions (84). In addition, the anterior insula  
401 region is also generally associated with the sense of agency, *i.e.*, the awareness of who performs  
402 an action (85). In the present study, the participants discriminated between marks resulting from  
403 human intention and those caused by fortuitous natural events. The processes associated with  
404 this choice likely contributed to the mobilisation of the cingulate and insular regions, thus  
405 suggesting that the salience network could be involved in attributing an origin to the outcome  
406 of an action, in addition to its role in attributing an action or intention. Notably, the regions  
407 concerned belong to the dorsal part of the salience network, mainly involved in cognition (86).  
408 Interestingly, this subnetwork has not been found in the macaque, suggesting that it is engaged  
409 in human-specific abilities (87). Distinguishing between human production and natural marks  
410 could be part of these functions.

411

## 412 **Conclusion**

413 In a first study, we showed that the perception of schematic engravings engaged visual  
414 associative areas similar to those involved in object recognition (55). This result was compatible  
415 with a representational function of the engravings. The present study represents a further step.  
416 Whereas the first study was based on a brief presentation of schematised engravings, the  
417 experimental protocol of the present study involved a more careful inspection of actual pictures  
418 to recognize intentionally-made engravings from non-human marks. In addition, this study  
419 allowed the effect of expertise to be characterised, as well as the direct comparison of attributing  
420 human or not human origin to abstract marks. The comparison of activations between  
421 archaeologists and controls showed that the effect of familiarity mainly concerned visual  
422 associative areas, confirming their central role in the visual processing of engravings. The  
423 results showed that it was easier to correctly attribute a human than a non-human origin to the  
424 marks, whichever the expertise level, but that the nature of the attribution did not bear on visual  
425 regions. Since Palaeolithic abstract patterns resulted from human intention, the judgment  
426 concerning their attribution involved the salience network, which plays a pivotal role in  
427 perceptual decision-making and attribution of intention. The present study indicates that the  
428 visual processing of the earliest known engravings involves two categories of brain regions: 1.  
429 visual regions and, more specifically, associative visual areas for the processing of their global  
430 visual organisation, some of which are sensitive to familiarity, and 2. the salience network,  
431 which is necessary for deciding whether the marks result from a human intention. This result  
432 confirms that mere and exclusive processing of abstract engravings by the primary visual cortex  
433 is unlikely to explain their emergence and pristine perception, which required actions,  
434 intentions and the brain areas to infer the communicative potential of visual patterns.

435

## 436 **Fundings**

437 This work was supported by the CNRS project 80 Prime Neurobeads, a grant from the IdEx  
438 Bordeaux/CNRS (PEPS 2015). Francesco d’Errico’s work is supported by the European  
439 Research Council through a Synergy Grant for the project Evolution of Cognitive Tools for  
440 Quantification (QUANTA), No. 951388; the Research Council of Norway through its Centres  
441 of Excellence funding scheme, SFF Centre for Early Sapiens Behaviour (SapienCE), project  
442 number 262618, the Talents Programme the Bordeaux University [grant number: 191022\_001]  
443 and the *Grand Programme de Recherche* ‘Human Past’ of the *Initiative d’Excellence* (IdEx) of  
444 the Bordeaux University.

## 445 **Acknowledgements**

446 The authors thank Ginesis Lab (Labcom Programme 2016, ANR 16LCV2-0006-01) for their  
447 help in data management and processing. They are also indebted to Violaine Verrecchia for her  
448 help in data analysis.

449

## 450 **References**

- 451
- 452 1. Coolidge FL, Wynn T. An Introduction to Cognitive Archaeology. *Curr Dir Psychol Sci.*  
453 2016 Dec;25(6):386–92.
  - 454 2. Currie A, Killin A. From things to thinking: Cognitive archaeology. *Mind Lang.* 2019  
455 Apr;34(2):263–79.
  - 456 3. Davidson I. The archeology of cognitive evolution. *Wiley Interdiscip Rev Cogn Sci.*  
457 2010 Mar;1(2):214–29.
  - 458 4. Renfrew C, Zubrow EBW, editors. *The Ancient Mind: Elements of Cognitive*  
459 *Archaeology* [Internet]. 1st ed. Cambridge University Press; 1994 [cited 2021 Nov 30].  
460 Available from:  
461 <https://www.cambridge.org/core/product/identifier/9780511598388/type/book>
  - 462 5. Burke A. Spatial abilities, cognition and the pattern of Neanderthal and modern human  
463 dispersals. *Quat Int.* 2012 Jan;247:230–5.

- 464 6. Wadley L, Backwell L, d’Errico F, Sievers C. Cooked starchy rhizomes in Africa 170  
465 thousand years ago. *Science*. 2020 Jan 3;367(6473):87–91.
- 466 7. Ambrose SH. Paleolithic Technology and Human Evolution. *Science*. 2001 Mar  
467 2;291(5509):1748–53.
- 468 8. Henshilwood C, D’Errico F. *Homo symbolicus. The Dawn of Language, Imagination  
469 and Spirituality*. Cape Town, South Africa: Zebra Press; 2011. 249 p.
- 470 9. Langley MC, editor. *Osseous projectile weaponry: Towards an Understanding of  
471 Pleistocene Cultural Variability (Vertebrate Paleobiology and Paleoanthropology*. New  
472 York, NY: Springer; 2016.
- 473 10. Lewis JE, Harmand S. An earlier origin for stone tool making: implications for cognitive  
474 evolution and the transition to *Homo*. *Philos Trans R Soc B Biol Sci*. 2016 Jul  
475 5;371(1698):20150233.
- 476 11. Nowell A, Davidson I, editors. *Stone tools and the evolution of the human cognition*.  
477 First pbk ed. Boulder, Colo: University Press of Colorado; 2011. 234 p.
- 478 12. Soressi M, McPherron SP, Lenoir M, Dogandzic T, Goldberg P, Jacobs Z, et al.  
479 Neandertals made the first specialized bone tools in Europe. *Proc Natl Acad Sci*. 2013  
480 Aug 27;110(35):14186–90.
- 481 13. Van Kolfshoten T, Parfitt SA, Serangeli J, Bello SM. Lower Paleolithic bone tools from  
482 the ‘Spear Horizon’ at Schöningen (Germany). *J Hum Evol*. 2015 Dec;89:226–63.
- 483 14. Villa P, Boschian G, Pollarolo L, Saccà D, Marra F, Nomade S, et al. Elephant bones for  
484 the Middle Pleistocene toolmaker. Peresani M, editor. *PLOS ONE*. 2021 Aug  
485 26;16(8):e0256090.
- 486 15. Villa P, D’errico F. Bone and ivory points in the Lower and Middle Paleolithic of  
487 Europe. *J Hum Evol*. 2001 Aug;41(2):69–112.
- 488 16. Langley MC, Suddendorf T. Mobile containers in human cognitive evolution studies:  
489 Understudied and underrepresented. *Evol Anthropol Issues News Rev*. 2020  
490 Nov;29(6):299–309.
- 491 17. Brooks AS, Yellen JE, Potts R, Behrensmeier AK, Deino AL, Leslie DE, et al. Long-  
492 distance stone transport and pigment use in the earliest Middle Stone Age. *Science*. 2018  
493 Apr 6;360(6384):90–4.
- 494 18. Henshilwood CS, d’Errico F, van Niekerk KL, Coquinot Y, Jacobs Z, Lauritzen S-E, et  
495 al. A 100,000-Year-Old Ochre-Processing Workshop at Blombos Cave, South Africa.  
496 *Science*. 2011 Oct 14;334(6053):219–22.
- 497 19. Hodgskiss T. Cognitive Requirements for Ochre Use in the Middle Stone Age at Sibudu,  
498 South Africa. *Camb Archaeol J*. 2014 Oct;24(3):405–28.
- 499 20. Wadley L. Recognizing Complex Cognition through Innovative Technology in Stone  
500 Age and Palaeolithic Sites. *Camb Archaeol J*. 2013 Jun;23(2):163–83.



- 501 21. Watts I. Red ochre, body painting, and language: interpreting the Blombos ochre. In:  
502 Botha R, Knight C, editors. *The cradle of language*. Oxford University Press. 2009. p.  
503 93–129.
- 504 22. Blessing MA, Schmidt P. On the efficiency of Palaeolithic birch tar making. *J Archaeol*  
505 *Sci Rep*. 2021 Aug;38:103096.
- 506 23. Wadley L, Hodgskiss T, Grant M. Implications for complex cognition from the hafting  
507 of tools with compound adhesives in the Middle Stone Age, South Africa. *Proc Natl*  
508 *Acad Sci*. 2009 Jun 16;106(24):9590–4.
- 509 24. Martínón-Torres M, d’Errico F, Santos E, Álvaro Gallo A, Amano N, Archer W, et al.  
510 Earliest known human burial in Africa. *Nature*. 2021 May 6;593(7857):95–100.
- 511 25. Vandermeersch B, Bar-Yosef O. The Paleolithic Burials at Qafzeh Cave, Israel. *Paléo*.  
512 2019 Dec 30;(30–1):256–75.
- 513 26. d’Errico F, Vanhaeren M, Barton N, Bouzouggar A, Mienis H, Richter D, et al.  
514 Additional evidence on the use of personal ornaments in the Middle Paleolithic of North  
515 Africa. *Proc Natl Acad Sci*. 2009 Sep 22;106(38):16051–6.
- 516 27. Shipton C, Roberts P, Archer W, Armitage SJ, Bitu C, Blinkhorn J, et al. 78,000-year-  
517 old record of Middle and Later Stone Age innovation in an East African tropical forest.  
518 *Nat Commun*. 2018 Dec;9(1):1832.
- 519 28. Vanhaeren M. Middle Paleolithic Shell Beads in Israel and Algeria. *Science*. 2006 Jun  
520 23;312(5781):1785–8.
- 521 29. Henshilwood CS, d’Errico F, Watts I. Engraved ochres from the Middle Stone Age  
522 levels at Blombos Cave, South Africa. *J Hum Evol*. 2009 Jul;57(1):27–47.
- 523 30. Pitarch Martí A, Zilhão J, d’Errico F, Cantalejo-Duarte P, Domínguez-Bella S, Fullola  
524 JM, et al. The symbolic role of the underground world among Middle Paleolithic  
525 Neanderthals. *Proc Natl Acad Sci*. 2021 Aug 17;118(33):e2021495118.
- 526 31. Malafouris L. Metaplasticity and the human becoming: principles of neuroarchaeology. *J*  
527 *Anthropol Sci*. 2010;88(4):49–72.
- 528 32. Salagnon M, d’Errico F, Mellet E. Neuroimaging and Neuroarchaeology: a Window on  
529 Cognitive Evolution. *Intellectica*. 2020;(73):67–92.
- 530 33. Stout D, Hecht E. Neuroarchaeology. In: Bruner E, editor. *Human Paleoneurology*  
531 [Internet]. Cham: Springer International Publishing; 2015 [cited 2017 Jun 2]. p. 145–75.  
532 Available from: [http://link.springer.com/10.1007/978-3-319-08500-5\\_7](http://link.springer.com/10.1007/978-3-319-08500-5_7)
- 533 34. Hecht EE, Gutman DA, Khreisheh N, Taylor SV, Kilner J, Faisal AA, et al. Acquisition  
534 of Paleolithic toolmaking abilities involves structural remodeling to inferior  
535 frontoparietal regions. *Brain Struct Funct*. 2015 Jul;220(4):2315–31.
- 536 35. Putt SS, Wijekumar S, Franciscus RG, Spencer JP. The functional brain networks that  
537 underlie Early Stone Age tool manufacture. *Nat Hum Behav*. 2017 May 8;1:0102.



- 538 36. Stout D, Toth N, Schick K, Chaminade T. Neural correlates of Early Stone Age  
539 toolmaking: technology, language and cognition in human evolution. *Philos Trans R Soc*  
540 *B Biol Sci*. 2008 Jun 12;363(1499):1939–49.
- 541 37. Stout D, Chaminade T. The evolutionary neuroscience of tool making.  
542 *Neuropsychologia*. 2007;45(5):1091–100.
- 543 38. Uomini NT, Meyer GF. Shared Brain Lateralization Patterns in Language and  
544 Acheulean Stone Tool Production: A Functional Transcranial Doppler Ultrasound Study.  
545 Petraglia MD, editor. *PLoS ONE*. 2013 Aug 30;8(8):e72693.
- 546 39. Putt SSJ, Wijekumar S, Spencer JP. Prefrontal cortex activation supports the emergence  
547 of early stone age toolmaking skill. *NeuroImage*. 2019 Oct;199:57–69.
- 548 40. Stout D, Hecht E, Khreisheh N, Bradley B, Chaminade T. Cognitive Demands of Lower  
549 Paleolithic Toolmaking. Bicho N, editor. *PLOS ONE*. 2015 Apr 15;10(4):e0121804.
- 550 41. Henshilwood CS, D’Errico F. *Homo symbolicus* the dawn of language, imagination and  
551 spirituality [Internet]. Amsterdam; Philadelphia: John Benjamins Pub. Co.; 2011 [cited  
552 2016 Jun 28]. Available from: <http://site.ebrary.com/id/10509457>
- 553 42. Leder D, Hermann R, Hüls M, Russo G, Hoelzmann P, Nielbock R, et al. A 51,000-year-  
554 old engraved bone reveals Neanderthals’ capacity for symbolic behaviour. *Nat Ecol*  
555 *Evol*. 2021 Sep;5(9):1273–82.
- 556 43. Li Z, Doyon L, Li H, Wang Q, Zhang Z, Zhao Q, et al. Engraved bones from the archaic  
557 hominin site of Lingjing, Henan Province. *Antiquity*. 2019 Aug;93(370):886–900.
- 558 44. Majkić A, Evans S, Stepanchuk V, Tsvelykh A, d’Errico F. A decorated raven bone  
559 from the Zaskalnaya VI (Kolosovskaya) Neanderthal site, Crimea. Hardy K, editor.  
560 *PLOS ONE*. 2017 Mar 29;12(3):e0173435.
- 561 45. Majkić A, d’Errico F, Stepanchuk V. Assessing the significance of Palaeolithic engraved  
562 cortexes. A case study from the Mousterian site of Kiik-Koba, Crimea. Hardy K, editor.  
563 *PLOS ONE*. 2018 May 2;13(5):e0195049.
- 564 46. Prévost M, Groman-Yaroslavski I, Crater Gershtein KM, Tejero J-M, Zaidner Y. Early  
565 evidence for symbolic behavior in the Levantine Middle Paleolithic: A 120 ka old  
566 engraved aurochs bone shaft from the open-air site of Neshar Ramla, Israel. *Quat Int*.  
567 2021 Jan;S1040618221000021.
- 568 47. Rodríguez-Vidal J, d’Errico F, Pacheco FG, Blasco R, Rosell J, Jennings RP, et al. A  
569 rock engraving made by Neanderthals in Gibraltar. *Proc Natl Acad Sci*. 2014 Sep  
570 16;111(37):13301–6.
- 571 48. Shaham D, Belfer-Cohen A, Rabinovich R, Goren-Inbar N. A Mousterian Engraved  
572 Bone: Principles of Perception in Middle Paleolithic Art. *Curr Anthropol*. 2019  
573 Oct;60(5):708–16.
- 574 49. Zilhão J, Anesin D, Aubry T, Badal E, Cabanes D, Kehl M, et al. Precise dating of the  
575 Middle-to-Upper Paleolithic transition in Murcia (Spain) supports late Neandertal  
576 persistence in Iberia. *Heliyon*. 2017 Nov;3(11):e00435.

- 577 50. Hodgson D. Understanding the origins of paleoart: The neurovisual resonance theory  
578 and brain functioning. *Paleoanthropology*. 2006;2006:54–67.
- 579 51. Hodgson D. Decoding the Blombos engravings, shell beads and Diepkloof ostrich  
580 eggshell patterns. *Camb Archaeol J*. 2014;24(01):57–69.
- 581 52. Hodgson D. Deciphering Patterns in the Archaeology of South Africa. *Cogn Models*  
582 *Palaeolithic Archaeol*. 2016;133.
- 583 53. Malafouris L. Mark Making and Human Becoming. *J Archaeol Method Theory*. 2021  
584 Mar;28(1):95–119.
- 585 54. Tylén K, Fusaroli R, Rojo S, Heimann K, Fay N, Johannsen NN, et al. The evolution of  
586 early symbolic behavior in *Homo sapiens*. *Proc Natl Acad Sci*. 2020 Mar  
587 3;117(9):4578–84.
- 588 55. Mellet E, Salagnon M, Majkić A, Cremona S, Joliot M, Jobard G, et al. Neuroimaging  
589 supports the representational nature of the earliest human engravings. *R Soc Open Sci*.  
590 2019 Jul 26;6(7):190086.
- 591 56. Hodgson D. The origin, significance, and development of the earliest geometric patterns  
592 in the archaeological record. *J Archaeol Sci Rep*. 2019 Apr;24:588–92.
- 593 57. Hodgson D. Response to the critique by Mellet et al. of Hodgson’s Neurovisual  
594 Resonance Theory. *J Archaeol Sci Rep*. 2019 Dec;28:102041.
- 595 58. Mellet E, Colagè I, Bender A, Henshilwood CS, Hugdahl K, Lindstrøm TC, et al. What  
596 processes sparked off symbolic representations? A reply to Hodgson and an alternative  
597 perspective. *J Archaeol Sci Rep*. 2019 Nov;102043.
- 598 59. Joordens JCA, d’Errico F, Wesselingh FP, Munro S, de Vos J, Wallinga J, et al. *Homo*  
599 *erectus* at Trinil on Java used shells for tool production and engraving. *Nature*. 2014 Dec  
600 3;518(7538):228–31.
- 601 60. Texier P-J, Porraz G, Parkington J, Rigaud J-P, Poggenpoel C, Miller C, et al. A  
602 Howiesons Poort tradition of engraving ostrich eggshell containers dated to 60,000 years  
603 ago at Diepkloof Rock Shelter, South Africa. *Proc Natl Acad Sci*. 2010 Apr  
604 6;107(14):6180–5.
- 605 61. Fernandez-Jalvo Y, Andrews P. Atlas of vertebrate taphonomic identifications: 1001+  
606 Images of Fossil and Recent Mammal Bone Modification. Dordrecht Heidelberg New  
607 York London: Springer; 2016. 359 p. (Vertebrate Paleobiology and Paleoanthropology  
608 Series).
- 609 62. Gorgolewski K, Burns CD, Madison C, Clark D, Halchenko YO, Waskom ML, et al.  
610 Nipype: A Flexible, Lightweight and Extensible Neuroimaging Data Processing  
611 Framework in Python. *Front Neuroinformatics* [Internet]. 2011 [cited 2021 Jul 15];5.  
612 Available from: <http://journal.frontiersin.org/article/10.3389/fninf.2011.00013/abstract>
- 613 63. Joliot M, Jobard G, Naveau M, Delcroix N, Petit L, Zago L, et al. AICHA: An atlas of  
614 intrinsic connectivity of homotopic areas. *J Neurosci Methods*. 2015 Oct;254:46–59.

- 615 64. Bilalić M, Campitelli G. Studies of the Activation and Structural Changes of the Brain  
616 Associated with Expertise. In: Ericsson KA, Hoffman RR, Kozbelt A, Williams AM,  
617 editors. *The Cambridge Handbook of Expertise and Expert Performance* [Internet]. 2nd  
618 ed. Cambridge University Press; 2018 [cited 2021 Jul 16]. p. 233–54. Available from:  
619 [https://www.cambridge.org/core/product/identifier/9781316480748%23CN-bp-](https://www.cambridge.org/core/product/identifier/9781316480748%23CN-bp-14/type/book_part)  
620 [14/type/book\\_part](https://www.cambridge.org/core/product/identifier/9781316480748%23CN-bp-14/type/book_part)
- 621 65. Harel A. What is special about expertise? Visual expertise reveals the interactive nature  
622 of real-world object recognition. *Neuropsychologia*. 2016 Mar;83:88–99.
- 623 66. Bilalić M. Revisiting the Role of the Fusiform Face Area in Expertise. *J Cogn Neurosci*.  
624 2016 Sep 1;28(9):1345–57.
- 625 67. Harley EM, Pope WB, Villablanca JP, Mumford J, Suh R, Mazziotta JC, et al.  
626 Engagement of fusiform cortex and disengagement of lateral occipital cortex in the  
627 acquisition of radiological expertise. *Cereb Cortex N Y N 1991*. 2009 Nov;19(11):2746–  
628 54.
- 629 68. Bilalic M, Langner R, Ulrich R, Grodd W. Many Faces of Expertise: Fusiform Face  
630 Area in Chess Experts and Novices. *J Neurosci*. 2011 Jul 13;31(28):10206–14.
- 631 69. Bilalić M, Grottenhaler T, Nägele T, Lindig T. The Faces in Radiological Images:  
632 Fusiform Face Area Supports Radiological Expertise. *Cereb Cortex*. 2016  
633 Mar;26(3):1004–14.
- 634 70. Gauthier I, Tarr MJ, Anderson AW, Skudlarski P, Gore JC. Activation of the middle  
635 fusiform ‘face area’ increases with expertise in recognizing novel objects. *Nat Neurosci*.  
636 1999 Jun;2(6):568–73.
- 637 71. Gauthier I, Skudlarski P, Gore JC, Anderson AW. Expertise for cars and birds recruits  
638 brain areas involved in face recognition. *Nat Neurosci*. 2000;3(2):7.
- 639 72. Xu Y. Revisiting the Role of the Fusiform Face Area in Visual Expertise. *Cereb Cortex*.  
640 2005 Aug 1;15(8):1234–42.
- 641 73. Aggleton JP, Dumont JR, Warburton EC. Unraveling the contributions of the  
642 diencephalon to recognition memory: A review. *Learn Mem*. 2011 May 19;18(6):384–  
643 400.
- 644 74. Kafkas A, Montaldi D. Two separate, but interacting, neural systems for familiarity and  
645 novelty detection: A dual-route mechanism: Familiarity and Novelty Detection  
646 Processes. *Hippocampus*. 2014 May;24(5):516–27.
- 647 75. Menon V. Salience Network. In: *Brain Mapping* [Internet]. Elsevier; 2015 [cited 2021  
648 May 25]. p. 597–611. Available from:  
649 <https://linkinghub.elsevier.com/retrieve/pii/B978012397025100052X>
- 650 76. Seeley WW, Menon V, Schatzberg AF, Keller J, Glover GH, Kenna H, et al. Dissociable  
651 Intrinsic Connectivity Networks for Salience Processing and Executive Control. *J*  
652 *Neurosci*. 2007 Feb 28;27(9):2349–56.

- 653 77. Zhou K, Zhu L, Hou G, Chen X, Chen B, Yang C, et al. The Contribution of Thalamic  
654 Nuclei in Saliency Processing. *Front Behav Neurosci*. 2021 Feb 16;15:634618.
- 655 78. Chand GB, Dhamala M. The saliency network dynamics in perceptual decision-making.  
656 *NeuroImage*. 2016 Jul;134:85–93.
- 657 79. Lamichhane B, Adhikari BM, Dhamala M. Saliency Network Activity in Perceptual  
658 Decisions. *Brain Connect*. 2016 Sep;6(7):558–71.
- 659 80. Uddin LQ. Saliency processing and insular cortical function and dysfunction. *Nat Rev*  
660 *Neurosci*. 2015 Jan;16(1):55–61.
- 661 81. White TP, Engen NH, Sørensen S, Overgaard M, Shergill SS. Uncertainty and  
662 confidence from the triple-network perspective: Voxel-based meta-analyses. *Brain*  
663 *Cogn*. 2014 Mar;85:191–200.
- 664 82. Neta M, Miezin FM, Nelson SM, Dubis JW, Dosenbach NUF, Schlaggar BL, et al.  
665 Spatial and Temporal Characteristics of Error-Related Activity in the Human Brain. *J*  
666 *Neurosci*. 2015 Jan 7;35(1):253–66.
- 667 83. Neta M, Nelson SM, Petersen SE. Dorsal Anterior Cingulate, Medial Superior Frontal  
668 Cortex, and Anterior Insula Show Performance Reporting-Related Late Task Control  
669 Signals. *Cereb Cortex*. 2017 Mar 1;bhw053.
- 670 84. Rijpma MG, Shdo SM, Shany-Ur T, Toller G, Kramer JH, Miller BL, et al. Saliency  
671 driven attention is pivotal to understanding others' intentions. *Cogn Neuropsychol*. 2021  
672 Jan 2;38(1):88–106.
- 673 85. Farrer C, Frith CD. Experiencing Oneself vs Another Person as Being the Cause of an  
674 Action: The Neural Correlates of the Experience of Agency. *NeuroImage*. 2002  
675 Mar;15(3):596–603.
- 676 86. Touroutoglou A, Hollenbeck M, Dickerson BC, Feldman Barrett L. Dissociable large-  
677 scale networks anchored in the right anterior insula subserve affective experience and  
678 attention. *NeuroImage*. 2012 May;60(4):1947–58.
- 679 87. Touroutoglou A, Bliss-Moreau E, Zhang J, Mantini D, Vanduffel W, Dickerson BC, et  
680 al. A ventral saliency network in the macaque brain. *NeuroImage*. 2016 May;132:190–7.
- 681
